# Supplementary material for: Radiofrequency ablation using internally cooled wet electrodes in bipolar mode for the treatment of recurrent hepatocellular carcinoma after locoregional treatment: A randomized prospective comparative study
Source: PLoS One. 2020 Sep 28;15(9):e0239733. doi: 10.1371/journal.pone.0239733 (PMC7521687; doi:10.1371/journal.pone.0239733)
Supplement: S3 File — (XLSX) [file pone.0239733.s004.xlsx]

## Sheet: PATIENT
Case No.	Group	Gender	Age	No. of tumors	Size of the largest tumor (cm)	Tip length	Previous treatment	Time to recur (months)	AFP(ng/ml)	Child-Pugh score	Bilirubin	Albumin	PT INR	Platelet (10^3/ul)	Complication (Y/N)	Complication	Technical success	Technical effectiveness	LTP	LTP interval (months)	IDR	IDR interval (months)	EM	EM interval (months)	Death	AIR	Last visit (months)	LTP_FREE_TIME (months)	RECUR_FREE_TIME (months)
S001	1	M	77	1	2.4	2.5 cm	rfa,tace,op	22.2667	1.8	5	0.4	4.4	1.03	153	0	0	1	1	1	13.5333	1	5.5	0		0	0	29.5667	13.5333	5.5
S002	0	F	74	1	2.34	2.5 cm	tace	22.5667	161.2	5	1	3.6	1.26	60	0	0	1	1	1	24.1667	1	3.56667	0		0	0	31.5667	24.1667	3.56667
S003	0	M	61	1	1.3	2.5 cm	tace,op	4.53333	18.5	5	0.6	4.1	0.9	140	0	0	1	1	0		1	4	1	21.1667	0	0	30.5667	30.5667	4
S004	1	F	71	1	1	2.5 cm	peit,tace	10.6	4.5	5	1.2	3.9	1.2	82	0	0	1	1	0		0		0		0	0	31.9333	31.9333	31.9333
S005	0	M	72	1	1.1	2 cm	rfa	13.5	3.3	5	0.3	4	0.98	226	0	0	1	1	0		0		0		0	0	31	31	31
S006	1	M	51	1	1.5	2 cm	tace	14.0667	45.5	5	0.6	4.5	1.14	239	0	0	1	1	0		0		0		0	0	31.1667	31.1667	31.1667
S007	0	M	68	1	1.3	2.5 cm	rfa,tace,peit	5.6	1.3	5	0.3	4.2	1.08	178	0	0	1	1	0		1	8.43333	0		0	0	31.0333	31.0333	8.43333
S008	1	M	69	1	1.7	2.5 cm	tace	6.16667	1.4	5	0.3	4.4	1.04	107	0	0	1	1	0		1	2.86667	0		0	0	29.4	29.4	2.86667
S009	1	M	67	1	1.2	2.5 cm	rfa,peit	22.0333	52	8	2.2	3	1.22	97	0	0	1	1	0		0		0		0	0	30.8333	30.8333	30.8333
S010	1	F	73	2	1.3	2 cm	tace,peit	4	1.6	5	1	4.2	1.02	115	0	0	1	1	0		0		0		0	0	28.3333	28.3333	28.3333
S011	1	M	61	2	2.5	2.5 cm	tace,peit	3.43333	9.2	5	0.9	4	1.17	60	0	0	1	1	1	5.1	1	9.9	0		0	0	18.5	5.1	5.1
S012	0	M	71	1	2	2.5 cm	rfa,tace,peit,op	5.76667	6.4	5	0.5	4.1	1.11	124	1	Small pneumothorax, Rt.	1	1	0		1	0.9	0		0	0	29.4667	29.4667	0.9
S013	0	M	65	1	1.2	2 cm	rfa,tace	26.7333	6.3	5	1.4	4.1	1	168	0	0	1	1	1	14.3333	1	14.3333	0		0	0	25.0333	14.3333	14.3333
S014	1	F	79	1	1	2 cm	rfa	2.56667	35.9	5	1.2	3.9	1.07	98	0	0	1	1	0		1	18.4667	0		0	0	27.8667	27.8667	18.4667
S015	1	M	61	1	1.2	2 cm	rfa,tace	4.3	4.7	5	0.5	4.6	1	153	0	0	1	1	1	11.2	1	1.6	0		0	0	27.8333	11.2	1.6
S016	0	M	59	1	2.5	2.5 cm	tace	23.2667	926	5	0.3	4.6	1	117	0	0	1	1	0		1	28	0		0	0	29.2	29.2	28
S017	0	M	59	1	0.7	2 cm	rfa,peit	11.7333	7.9	5	0.7	4	1.02	105	0	0	1	1	0		1	10.3333	0		0	0	26.7	26.7	10.3333
S018	0	M	71	1	1.5	2.5 cm	tace	8.5	0	5	0.4	3.9	0.97	150	0	0	1	1	0		0		0		0	0	12.4667	12.4667	12.4667
S019	1	M	76	1	1.9	2.5 cm	rfa,tace	20.4333	0	7	0.8	3.2	1.2	97	0	0	1	1	0		1	0.733333	0		0	0	0.733333	0.733333	0.733333
S020	1	M	70	2	2.3	2.5 cm	tace	0.933333	39.7	5	0.4	3.6	1.09	114	0	0	1	1	0		0		0		0	0	6.1	6.1	6.1
S021	1	M	55	1	1.5	2.5 cm	tace	7.5	36.8	5	0.7	4	1.11	87	0	0	1	1	0		0		0		0	0	25.9	25.9	25.9
S022	1	M	49	1	1.7	2 cm	tace	9.66667	5.3	5	1.5	4.3	1.19	106	0	0	1	1	0		1	16.1	0		0	0	27.0667	27.0667	16.1
S023	0	F	48	1	1	2 cm	tace	13.1	4.5	5	0.3	4.4	1.02	185	0	0	1	1	0		1	20.4667	0		0	0	26.9	26.9	20.4667
S024	1	F	65	1	1.6	2 cm	tace	3.13333	9.7	6	0.2	3.9	1.05	93	1	Minimal Rt. pneumothorax.	1	1	1	19.3333	0		0		0	0	26.6333	19.3333	19.3333
S025	0	F	49	1	1	2 cm	rfa,tace	3.56667	53.5	5	0.4	4.6	1.06	119	0	0	1	1	1	4.13333	1	10.8333	0		0	0	22.1333	4.13333	4.13333
S026	0	M	62	1	2.2	2.5 cm	rfa	87.3	0	5	0.4	4.5	1.02	162	0	0	1	1	0		0		0		0	0	27.8	27.8	27.8
S027	0	M	57	2	1.6	2.5 cm	rfa,tace	15.3667	4.4	5	0.9	4.4	1.04	196	0	0	1	1	0		1	2.56667	0		0	0	28.4	28.4	2.56667
S028	0	F	58	1	1.3	2 cm	rfa,tace	12.8667	79.2	5	0.5	4.1	1.01	219	0	0	1	1	0		0		0		0	0	25.8	25.8	25.8
S029	0	M	61	1	2	2.5 cm	tace	20.2333	2.4	5	0.4	3.9	1.05	106	0	0	1	1	0		1	0.933333	0		0	0	26.2	26.2	0.933333
S030	0	M	71	1	2.6	2.5 cm	rfa	42.3667	20.5	5	0.7	3.9	1.06	120	0	0	1	1	0		1	3.3	0		0	0	27.2667	27.2667	3.3
S031	1	M	77	1	1	2 cm	rfa,tace	7.7	6.6	5	0.5	3.9	1.11	145	0	0	1	1	0		0		0		0	0	24.2	24.2	24.2
S032	1	M	67	1	1.9	2 cm	tace	1.6	15.4	5	0.6	4	1.03	138	0	0	1	1	1	12.9333	0		0		0	0	27.1667	12.9333	12.9333
S033	0	M	55	1	1.2	2 cm	rfa,tace	1.73333	4.9	5	1.3	3.7	1.13	69	0	0	1	0								0
S034	1	F	60	1	2.6	2.5 cm	tace	2.16667	147	6	0.8	3.4	1.17	86	0	0	1	1	0		1	4.4	0		0	0	25.8	25.8	4.4
S035	1	F	55	1	1.1	2 cm	tace	3.13333	5.4	5	1.3	3.6	1.23	95	0	0	1	1	0		0		0		0	0	25.1667	25.1667	25.1667
S036	0	M	74	1	0.5	2 cm	rfa	33.1	2.7	5	0.3	4	1.03	150	0	0	1	1	0		0		0		0	0	24.9333	24.9333	24.9333
S037	0	M	58	1	0.7	2 cm	tace,op	4.53333	2.7	5	1	4.1	1.15	99	0	0	1	1	0		0		0		0	0	26	26	26
S038	1	M	56	1	1.2	2.5 cm	tace	3.6	89.9	7	2.3	3	1.18	51	1	Small amount of hematoma at S8 extracapsular portion without contrast extravasation. Otherwise, no significant RFA-related complication.	1	1	0		1	4	1	21.8667	1	0	23.8667	23.8667	4
S039	0	M	83	1	1.5	2 cm	rfa,tace,peit	26.9	3.3	5	0.9	3.9	1.13	84	0	0	1	1	0		0		0		0	0	23.6	23.6	23.6
S040	1	M	76	1	2	2.5 cm	tace	19.0667	25.4	5	0.6	4.4	1.05	177	0	0	1	1	1	8.5	0		1	14.7667	0	0	19.6	8.5	8.5
S041	0	M	64	1	1.7	2 cm	rfa	9.1	21	5	0.3	4.1	1.04	163	0	0	1	1	0		1	13.7333	0		0	0	25.1333	25.1333	13.7333
S042	0	M	65	1	2	2.5 cm	rfa,peit	36.4	2.6	5	0.6	4.2	1.04	197	0	0	1	1	0		0		0		0	0	24.3	24.3	24.3
S043	0	F	41	1	1.5	2.5 cm	tace,peit,op	1.6	240.9	5	0.6	4	1.04	130	0	0	1	1	1	19.4333	1	8.83333	0		0	0	25.4	19.4333	8.83333
S044	1	M	51	3	1.2	2 cm	tace,peit	19.5333	8	5	0.5	4.4	1.18	164	0	0	1	1	0		1	21.6333	1	21.6333	0	0	23.7667	23.7667	21.6333
S045	1	M	69	1	0.8	2 cm	rfa,tace,peit	7.3	3.8	5	0.4	4.2	1.07	100	0	0	1	1	0		1	21.3333	0		0	0	25.9	25.9	21.3333
S046	1	M	56	1	1	2 cm	rfa,tace	7.46667	1	5	0.5	4.6	1.22	96	0	0	1	1	0		1	3.76667	0		0	0	23.5667	23.5667	3.76667
S047	0	M	50	1	2.5	2.5 cm	tace	29	1.5	5	0.4	4.9	0.94	194	0	0	1	1	0		0		1	17.2	0	0	24.8667	24.8667	17.2
S048	1	M	65	1	3	2.5 cm	tace	2.26667	2.8	6	0.6	3.4	1.12	419	0	0	1	1	0		0		0		0	0	23.5	23.5	23.5
S049	0	M	61	1	0.8	2 cm	tace,peit	7.76667	20.1	5	0.6	3.7	1.15	91	0	0	1	1	0		0		0		0	0	24.5667	24.5667	24.5667
S050	1	M	73	1	1.2	2.5 cm	tace	2.2	0	5	0.8	4.8	0.96	149	0	0	1	1	0		1	3.06667	0		0	0	25.3	25.3	3.06667
S051	1	M	68	1	2.5	2.5 cm	tace,peit	5.36667	2.2	5	0.4	3.9	1.08	338	0	0	1	1	0		1	13.1667	0		0	0	22.6	22.6	13.1667
S052	1	M	59	1	1.5	2 cm	tace	23.1333	2.4	5	0.9	4.5	1.04	113	0	0	1	1	0		0		0		0	0	23.9667	23.9667	23.9667
S053	1	M	55	1	1.7	2 cm	tace	26.5333	2.4	6	1.2	3.5	1.25	54	0	0	1	1	1	15.3	0		0		0	0	23.8	15.3	15.3
S054	0	M	76	1	2.5	2.5 cm	tace	2.9	1.5	7	0.7	2.4	1	132	0	0	1	1	0		1	1.03333	0		0	0	12.0333	12.0333	1.03333
S055	0	M	74	1	1.2	2 cm	peit	36.5	1.5	5	0.6	4.4	0.99	112	0	0	1	1	0		0		0		0	0	24.1	24.1	24.1
S056	1	M	42	1	1.6	2 cm	rfa,tace	5.03333	9.7	6	2.8	3.7	1.21	91	0	0	1	1	0		0		0		0	0	23.6333	23.6333	23.6333
S057	0	M	66	1	1.5	2 cm	tace	4.3	2.6	5	1.2	3.8	1.16	86	0	0	1	1	0		1	5.33333	0		0	0	21.5667	21.5667	5.33333
S058	0	M	74	1	1.9	2 cm	rfa,tace	17.0333	1.9	5	0.4	4.4	0.99	130	0	0	1	1	0		0		0		0	0	23	23	23
S059	1	M	66	1	1.3	2 cm	rfa,tace	1.56667	145.5	5	1.2	3.6	1.23	77	0	0	1	1	1	11.1	1	1.6	0		0	0	22.5333	11.1	1.6
S060	0	M	55	1	1	2 cm	tace,op	6.46667	47	6	2.4	4.3	1.16	128	0	0	1	1	0		0		0		0	0	5.46667	5.46667	5.46667
S061	0	M	54	2	2.5	2.5 cm	tace	10.2333	8.5	5	0.7	4.1	1.24	123	0	0	1	1	0		1	3.73333	1	3.73333	0	0	4.86667	4.86667	3.73333
S062	1	M	76	1	1.7	2 cm	rfa,tace	22.1667	2.8	7	2	3.4	1.29	66	0	0	1	1	0		0		0		0	0	9	9	9
S063	1	M	60	2	1.4	2 cm	tace	0.933333	2.1	5	0.3	3.9	1.08	164	0	0	1	1	0		0		0		0	0	21.8333	21.8333	21.8333
S064	1	M	75	1	1.5	2.5 cm	rfa,tace	0.833333	26.1	5	0.6	3.9	1.07	152	0	0	1	1	0		0		0		0	0	22.5333	22.5333	22.5333
S065	1	M	66	1	1.6	2.5 cm	rfa	20.4333	1.5	5	1.4	4.3	1.16	160	0	0	1	1	1	4.8	1	7.4	0		0	0	9.96667	4.8	4.8
S066	1	M	66	1	2.5	2.5 cm	tace	2.43333	3.3	5	0.6	4	1.25	139	0	0	1	1	0		0		0		0	0	23.1	23.1	23.1
S067	1	M	53	1	1.8	2.5 cm	tace	1.06667	6.9	5	0.8	3.7	1.17	77	0	0	1	1	0		1	12.2333	0		0	0	22.8	22.8	12.2333
S068	0	M	74	1	1.6	2 cm	tace,peit	5.9	7.2	5	0.5	4.4	1.09	122	0	0	1	1	0		1	4.03333	0		0	0	20.6333	20.6333	4.03333
S069	1	M	67	1	1.9	2 cm	tace,peit	12.6	40.7	5	1.1	3.8	1.11	127	0	0	1	1	0		0		0		0	0	21.5	21.5	21.5
S070	0	M	67	1	1.9	2 cm	rfa,tace	5.53333	27.7	5	0.5	3.8	0.93	176	0	0	1	1	1	9.5	0		0		0	0	9.5	9.5	9.5
S071	0	M	49	2	3.3	2.5 cm	tace	2.2	134.5	5	0.7	4	1.19	116	0	0	1	0								0
S072	1	M	43	1	1.1	2 cm	rfa,tace,op	5.76667	6.7	5	0.4	4.3	0.96	221	0	0	1	1	0		1	21.4333	0		0	0	22.2667	22.2667	21.4333
S073	0	M	72	1	4	2.5 cm	tace	0.9	29.5	5	0.4	3.6	1.04	93	0	0	1	1	1	19.5	1	19.5	1	19.5	0	1	21.1	19.5	19.5
S074	1	M	52	1	2.1	2.5 cm	rfa,tace,peit	6.5	8.7	7	0.7	2.2	1	149	0	0	1	1	0		0		0		0	0	4.56667	4.56667	4.56667
S075	0	F	84	1	3.4	2.5 cm	tace	3.86667	984	5	0.3	4	0.96	176	0	0	1	1	1	7.53333	1	7.53333	0		0	0	16.3667	7.53333	7.53333
S076	0	M	72	1	2.1	2.5 cm	tace,peit	3	11.5	6	2.2	3.7	1.13	61	0	0	1	1	0		1	17.8667	0		0	0	20.4	20.4	17.8667
S077	1	M	76	1	2	2.5 cm	rfa,tace,peit	4.16667	2.3	5	0.4	4.1	1.09	120	0	0	1	1	0		0		0		0	0	18.4333	18.4333	18.4333

## Sheet: NODULE
Case No.	Group	Tip length	Location	Size (cm)	Depth	Type of recurrence	Dmx (mm)	Dmi (mm)	Dv (mm)	Ablation volume (cm3)	Effective ablation volume (cm3)	Energy (kcal)	Ablation time (min)	Energy/time (kcal/min)	Ablation volume/time (cm3/min)	Effective volume/time (cm3/min)	Dmin/time (mm/min)	Dmin/energy (mm/kcal)	Technical success	Technical effectiveness	LTP	LTP interval (months)	Last visit (months)	LTP_FREE_TIME (months)
S001-1	1	2.5 cm	S2	2.4	central	1	60.35	41.25	51.68	67.3631	36.7511	26.49	15	1.766	4.49088	2.45007	2.75	1.55719	1	1	1	13.5333	29.5667	13.5333
S002-1	0	2.5 cm	S8	2.34	central	0	41.88	33.14	33.24	24.1557	19.0571	16.55	10	1.655	2.41557	1.90571	3.314	2.00242	1	1	1	24.1667	31.5667	24.1667
S003-1	0	2.5 cm	S8	1.3	subcap	0	68.5	38.45	40.14	55.3558	29.7638	23.94	16	1.49625	3.45974	1.86023	2.40313	1.6061	1	1	0		30.5667	30.5667
S004-1	1	2.5 cm	S4	1	central	0	51.93	35.45	28.43	27.4038	23.3264	47	20	2.35	1.37019	1.16632	1.7725	0.754255	1	1	0		31.9333	31.9333
S005-1	0	2 cm	S7	1.1	subcap	0	50.95	35.84	33.68	32.202	24.1047	11.43	11.833	0.965943	2.72137	2.03708	3.02882	3.13561	1	1	0		31	31
S006-1	1	2 cm	S6	1.5	central	0	53.72	42.53	37.72	45.1234	40.2796	26.19	14	1.87071	3.2231	2.87711	3.03786	1.6239	1	1	0		31.1667	31.1667
S007-1	0	2.5 cm	S8	1.3	central	0	52.39	32.54	40.9	36.508	18.0406	11.76	11	1.06909	3.31891	1.64006	2.95818	2.76701	1	1	0		31.0333	31.0333
S008-1	1	2.5 cm	S7	1.7	central	0	54.79	44.9	41.33	53.2368	47.3956	25.71	15.5	1.65871	3.43463	3.05778	2.89677	1.7464	1	1	0		29.4	29.4
S009-1	1	2.5 cm	S8	1.2	subcap	0	40.77	28.39	22.12	13.4057	11.981	35.205	16	2.20031	0.837857	0.748815	1.77438	0.80642	1	1	0		30.8333	30.8333
S010-1	1	2 cm	S5/8	1.3	subcap	0	53.63	33.1	56.39	52.4127	18.9881	14.298	12	1.1915	4.36772	1.58235	2.75833	2.31501	1	1	0		28.3333	28.3333
S010-2	1	2 cm	S4	1	central	1	52.82	29.42	42.89	34.8976	13.333	9.532	8	1.1915	4.3622	1.66662	3.6775	3.08645	1	1	0		28.3333	28.3333
S011-1	1	2.5 cm	S7	1	central	0	35.91	26.82	25.69	12.955	10.1012	7.4996	5.3	1.41502	2.44434	1.9059	5.06038	3.57619	1	1	1	18.5	18.5	18.5
S011-2	1	2.5 cm	S8	2.5	central	0	40.96	27.25	31.4	18.3508	10.5949	19.81	14	1.415	1.31077	0.756781	1.94643	1.37557	1	1	1	5.1	18.5	5.1
S012-1	0	2.5 cm	S8 dome	2	subcap	0	47.39	38.4	29	27.6321	29.6478	11.27	10	1.127	2.76321	2.96478	3.84	3.40728	1	1	0		29.4667	29.4667
S013-1	0	2 cm	S8	1.2	central	0	34.49	25.59	43.03	19.8854	8.77424	27.08	22.5	1.20356	0.883794	0.389966	1.13733	0.944978	1	1	1	14.3333	25.0333	14.3333
S014-1	1	2 cm	S7/8	1	central	1	39.8	32.06	33.38	22.3014	17.254	15.506	18	0.861444	1.23897	0.958554	1.78111	2.06759	1	1	0		27.8667	27.8667
S015-1	1	2 cm	S7	1.2	central	0	45.9	23.78	24.82	14.1849	7.041	3.988	15	0.265867	0.945657	0.4694	1.58533	5.96289	1	1	1	11.2	27.8333	11.2
S016-1	0	2.5 cm	S4	2.5	central	0	86.28	34.8	55.33	86.9859	22.0666	34.07	20.167	1.68939	4.31328	1.0942	1.72559	1.02143	1	1	0		29.2	29.2
S017-1	0	2 cm	S8	0.7	central	1	39.04	26.28	38.05	20.4404	9.50331	14.11	8	1.76375	2.55504	1.18791	3.285	1.86251	1	1	0		26.7	26.7
S018-1	0	2.5 cm	S6	1.5	subcap	0	45.31	30.62	26.82	19.483	15.0319	41.61	22.5	1.84933	0.865913	0.668085	1.36089	0.735881	1	1	0		12.4667	12.4667
S019-1	1	2.5 cm	S6	1.9	central	0	55.9	40.47	58.77	69.6144	34.7055	14.882	18.3	0.813224	3.80407	1.89648	2.21148	2.71939	1	1	0		0.733333	0.733333
S020-1	1	2.5 cm	S7 dome	1.2	subcap	0	52.01	33.6	31.92	29.207	19.8617	3.985	10	0.3985	2.9207	1.98617	3.36	8.43162	1	1	0		6.1	6.1
S020-2	1	2.5 cm	S7	2.3	subcap	0	33.09	20.97	19.46	7.07028	4.8283	4.631	9.72	0.47644	0.727395	0.496738	2.15741	4.52818	1	1	0		6.1	6.1
S021-1	1	2.5 cm	S7/8	1.5	central	0	62.8	35.9	57.46	67.8295	24.226	9.664	22.4	0.431429	3.0281	1.08152	1.60268	3.71482	1	1	0		25.9	25.9
S022-1	1	2 cm	S5/6	1.7	subcap	1	40.98	22.67	30.58	14.8751	6.10033	12.25	17	0.720588	0.875005	0.358843	1.33353	1.85061	1	1	0		27.0667	27.0667
S023-1	0	2 cm	S5	1	subcap	1	44.79	32.23	47.8	36.13	17.5299	16.44	11	1.49455	3.28454	1.59363	2.93	1.96046	1	1	0		26.9	26.9
S024-1	1	2 cm	S8	1.6	central	0	64.84	33.45	42.27	48.0032	19.5969	4.963	14.5	0.342276	3.31056	1.35151	2.3069	6.73988	1	1	1	19.3333	26.6333	19.3333
S025-1	0	2 cm	S8	1	central	0	38.44	20.18	30.71	12.4733	4.30291	13.06	13.5	0.967407	0.923952	0.318734	1.49481	1.54518	1	1	1	4.13333	22.1333	4.13333
S026-1	0	2.5 cm	S5	2.2	central	1	57.38	45.98	71.04	98.1366	50.8986	26.69	28.67	0.930938	3.42297	1.77532	1.60377	1.72274	1	1	0		27.8	27.8
S027-1	0	2.5 cm	S8 dome	1.6	central	1	46.23	31.87	31.51	24.3082	16.949	11.14	13	0.856923	1.86986	1.30377	2.45154	2.86086	1	1	0		28.4	28.4
S027-2	0	2.5 cm	S8	1.2	subcap	0	41	28.63	38.69	23.7795	12.2875	12.74	10	1.274	2.37795	1.22875	2.863	2.24725	1	1	0		28.4	28.4
S028-1	0	2 cm	S7	1.3	subcap	0	56.17	33.4	42.73	41.9742	19.5091	15.73	11.6	1.35603	3.61847	1.68182	2.87931	2.12333	1	1	0		25.8	25.8
S029-1	0	2.5 cm	S5/8	2	subcap	0	54.9	35.36	51.9	52.7534	23.1492	9.51	13	0.731538	4.05796	1.78071	2.72	3.71819	1	1	0		26.2	26.2
S030-1	0	2.5 cm	S6	2.6	central	1	64.75	41.87	42.73	60.6561	38.4333	19.81	9.75	2.03179	6.22114	3.94188	4.29436	2.11358	1	1	0		27.2667	27.2667
S031-1	1	2 cm	S7	1	central	0	29.34	24.01	23.82	8.78603	7.24728	2.271	8	0.283875	1.09825	0.90591	3.00125	10.5724	1	1	0		24.2	24.2
S032-1	1	2 cm	S6	1.9	central	0	33.05	28.35	20.51	10.0621	11.9305	4.341	9.87	0.439818	1.01946	1.20876	2.87234	6.53075	1	1	1	12.9333	27.1667	12.9333
S033-1	0	2 cm	S7/8	1.2	central	1	39.05	34.35	37.07	26.0357	21.2216	16.03	11	1.45727	2.36688	1.92924	3.12273	2.14286	1	0		0.866667	20.9667	20.9667
S034-1	1	2.5 cm	S7	2.6	subcap	0	63.5	24.95	32.01	26.5539	8.13224	16.008	19.75	0.810532	1.3445	0.411759	1.26329	1.5586	1	1	0		25.8	25.8
S035-1	1	2 cm	S7	1.1	subcap	0	37.05	27.55	21.78	11.6404	10.9487	9.69	12.6	0.769048	0.923838	0.868946	2.18651	2.84314	1	1	0		25.1667	25.1667
S036-1	0	2 cm	S8/S7	0.5	central	0	42.82	29.85	43.87	29.3601	13.9262	13.54	9	1.50444	3.26223	1.54735	3.31667	2.20458	1	1	0		24.9333	24.9333
S037-1	0	2 cm	S5/S8	0.7	subcap	0	57.24	33.36	33.44	33.4342	19.4391	19.32	19	1.01684	1.75969	1.02311	1.75579	1.72671	1	1	0		26	26
S038-1	1	2.5 cm	S8	1.2	central	0	53.64	37.39	39.62	41.6061	27.3694	15.592	22.3	0.699193	1.86575	1.22733	1.67668	2.39802	1	1	0		23.8667	23.8667
S039-1	0	2 cm	S8	1.5	central	0	39.14	27.69	37.62	21.3482	11.1165	23.08	14	1.64857	1.52487	0.794035	1.97786	1.19974	1	1	0		23.6	23.6
S040-1	1	2.5 cm	S8	2	central	0	43.86	35.06	42.34	34.0902	22.5649	5.216	10.93	0.477219	3.11896	2.0645	3.20769	6.72163	1	1	1	8.5	19.6	8.5
S041-1	0	2 cm	S3	1.7	subcap	1	46.62	33.35	38.2	31.0978	19.4217	18.2	23	0.791304	1.35208	0.84442	1.45	1.83242	1	1	0		25.1333	25.1333
S042-1	0	2.5 cm	S8	2	central	0	70.7	36.38	52.95	71.3094	25.2108	31.44	17	1.84941	4.19467	1.48299	2.14	1.15712	1	1	0		24.3	24.3
S043-1	0	2.5 cm	S6	1.5	central	0	68.59	55.99	47.72	95.9556	91.9031	20.16	12	1.68	7.9963	7.65859	4.66583	2.77728	1	1	1	19.4333	25.4	19.4333
S044-1	1	2 cm	S4	1	central	1	54.98	37.26	45.77	49.0939	27.0849	11.464	18.5	0.619676	2.65372	1.46405	2.01405	3.25017	1	1	0		23.7667	23.7667
S044-2	1	2 cm	S8	1	central	0	47.15	36.11	38.41	34.2414	24.6536	7.471	11	0.679182	3.11286	2.24124	3.28273	4.83336	1	1	0		23.7667	23.7667
S044-3	1	2 cm	S7	1.2	central	0	45.42	36.14	43.21	37.138	24.7151	5.012	7.5	0.668267	4.95173	3.29535	4.81867	7.21069	1	1	0		23.7667	23.7667
S045-1	1	2 cm	S5	0.8	central	1	43.08	37.99	45.7	39.1615	28.7082	5.724	11.9	0.481008	3.29089	2.41246	3.19244	6.63697	1	1	0		25.9	25.9
S046-1	1	2 cm	S6	1	subcap	0	49.32	43.19	36.24	40.4197	42.184	6.333	12	0.52775	3.36831	3.51534	3.59917	6.81983	1	1	0		23.5667	23.5667
S047-1	0	2.5 cm	S6	2.5	central	0	70.9	51.54	72.85	139.386	71.6856	50.96	30	1.69867	4.6462	2.38952	1.718	1.01138	1	1	0		24.8667	24.8667
S048-1	1	2.5 cm	S6	3	central	0	53.61	39.28	49.73	54.832	31.7331	15.858	21	0.755143	2.61105	1.5111	1.87048	2.47698	1	1	0		23.5	23.5
S049-1	0	2 cm	S8	0.8	central	1	53.02	27.73	34.73	26.7358	11.1647	23.65	14	1.68929	1.9097	0.797481	1.98071	1.17252	1	1	0		24.5667	24.5667
S050-1	1	2.5 cm	S6	1.2	central	1	35.76	29.61	40.19	22.2819	13.593	5.684	11	0.516727	2.02563	1.23572	2.69182	5.20936	1	1	0		25.3	25.3
S051-1	1	2.5 cm	S3	2.5	central	0	49.44	43.88	31.76	36.0765	44.2383	20.007	21.6333	0.924823	1.66763	2.04491	2.02835	2.19323	1	1	0		22.6	22.6
S052-1	1	2 cm	S8	1.5	central	0	55.84	36.64	30.85	33.0487	25.7552	5.494	12.983	0.423169	2.54554	1.98376	2.82215	6.66909	1	1	0		23.9667	23.9667
S053-1	1	2 cm	S2	1.7	central	1	39.82	30.76	31.31	20.0803	15.239	4.324	7.183	0.601977	2.79553	2.12154	4.28233	7.11378	1	1	1	15.3	23.8	15.3
S054-1	0	2.5 cm	S6	2.5	central	0	67.81	44.19	39.49	61.9589	45.1825	33.8	18	1.87778	3.44216	2.51014	2.455	1.3074	1	1	0		12.0333	12.0333
S055-1	0	2 cm	S6	1.2	subcap	1	61.21	34.09	59.7	65.2262	20.7434	21.7	17	1.27647	3.83684	1.2202	2.00529	1.57097	1	1	0		24.1	24.1
S056-1	1	2 cm	S6	1.6	subcap	0	46.55	40.9	46.9	46.7535	35.8235	14.914	18	0.828556	2.59742	1.9902	2.27222	2.74239	1	1	0		23.6333	23.6333
S057-1	0	2 cm	S6	1.5	subcap	1	53.4	30.91	47.28	40.8617	15.4631	19.56	18	1.08667	2.27009	0.859059	1.71722	1.58027	1	1	0		21.5667	21.5667
S058-1	0	2 cm	S8	1.9	central	0	53.65	40.04	25.57	28.7603	33.611	18.51	24	0.77125	1.19835	1.40046	1.66833	2.16316	1	1	0		23	23
S059-1	1	2 cm	S7	1.3	central	0	41.33	33.65	34.87	25.3922	19.9505	7.904	10	0.7904	2.53922	1.99505	3.365	4.25734	1	1	1	11.1	22.5333	11.1
S060-1	0	2 cm	S8	1	subcap	0	53.39	40.32	27.46	30.9514	34.321	13.97	9.75	1.43282	3.1745	3.5201	4.13538	2.88618	1	1	0		5.46667	5.46667
S061-1	0	2.5 cm	S6	2.5	subcap	0	61.79	46.13	42.73	63.7725	51.3983	67.37	35.17	1.91555	1.81326	1.46143	1.31163	0.684726	1	1	0		4.86667	4.86667
S061-2	0	2.5 cm	S5	1	central	1	33.53	23.93	24.9	10.461	7.17508	16.5	7.5	2.2	1.3948	0.956677	3.19067	1.4503	1	1	0		4.86667	4.86667
S062-1	1	2 cm	S5	1.7	central	0	42.32	32.89	35.37	25.7776	18.629	5.356	10.83	0.494552	2.38021	1.72013	3.03693	6.14078	1	1	0		9	9
S063-1	1	2 cm	S7	1.4	subcap	0	54.33	36.57	39.07	40.645	25.6079	2.972	7	0.424571	5.80642	3.65827	5.22429	12.3048	1	1	0		21.8333	21.8333
S063-2	1	2 cm	S4/8	1	subcap	1	49.87	23.96	35.37	22.1289	7.2021	2.548	7	0.364	3.16127	1.02887	3.42286	9.40345	1	1	0		21.8333	21.8333
S064-1	1	2.5 cm	S7	1.5	central	0	55.95	39.92	52.52	61.4206	33.3097	6.901	15.33	0.450163	4.00656	2.17284	2.60404	5.78467	1	1	0		22.5333	22.5333
S065-1	1	2.5 cm	S4/5	1.6	central	0	43.69	39.48	40.29	36.3877	32.2203	7.326	8.1	0.904444	4.49231	3.97782	4.87407	5.38903	1	1	1	4.8	9.96667	4.8
S066-1	1	2.5 cm	S6	2.5	central	0	41.59	26.84	53.41	31.2171	10.1239	6.995	11.45	0.610917	2.72638	0.88418	2.3441	3.83703	1	1	0		23.1	23.1
S067-1	1	2.5 cm	S8	1.8	central	0	58.07	36.05	32.96	36.1279	24.531	9.747	14.6	0.667603	2.47451	1.6802	2.46918	3.69857	1	1	0		22.8	22.8
S068-1	0	2 cm	S6	1.6	central	1	68.13	38.92	49.59	68.85	30.8686	8.66	8	1.0825	8.60625	3.85858	4.865	4.49423	1	1	0		20.6333	20.6333
S069-1	1	2 cm	S4	1.9	central	1	47.56	28.45	31.21	22.1114	12.0572	9.855	14	0.703929	1.57939	0.861227	2.03214	2.88686	1	1	0		21.5	21.5
S070-1	0	2 cm	S6	1.9	subcap	0	43.91	33.65	39.32	30.4201	19.9505	8.14	10	0.814	3.04201	1.99505	3.365	4.13391	1	1	1	9.5	9.5	9.5
S071-1	0	2.5 cm	S5	3.3	subcap	0	66.84	54.12	74.97	141.997	82.9988	44.65	23.33	1.91384	6.08647	3.5576	2.31976	1.21209	1	1	0		3.5	3.5
S071-2	0	2.5 cm	S8	1.5	central	0	45.45	34.68	41.7	34.415	21.8392	17.47	9	1.94111	3.82389	2.42657	3.85333	1.98512	1	0			3.5	3.5
S072-1	1	2 cm	S7	1.1	central	0	43.38	34.73	47.98	37.8489	21.9338	11.054	13.87	0.796972	2.72883	1.58138	2.50397	3.14185	1	1	0		22.2667	22.2667
S073-1	0	2.5 cm	S8	4	central	0	58.69	53.79	36.52	60.3664	81.4898	45.98	25	1.8392	2.41465	3.25959	2.1516	1.16986	1	1	1	19.5	21.1	19.5
S074-1	1	2.5 cm	S4	2.1	central	0	70.98	47.35	54	95.0273	55.5851	18.71	27	0.692963	3.51953	2.05871	1.7537	2.53073	1	1	0		4.56667	4.56667
S075-1	0	2.5 cm	S8	3.4	subcap	0	52.99	32.68	45.12	40.9113	18.2745	36.16	17.75	2.03718	2.30486	1.02955	1.84113	0.903761	1	1	1	7.53333	16.3667	7.53333
S076-1	0	2.5 cm	S8	2.1	central	0	35.45	29.54	33.57	18.4067	13.4968	18.79	10	1.879	1.84067	1.34968	2.954	1.57211	1	1	0		20.4	20.4
S077-1	1	2.5 cm	S8	2	central	0	55.37	41.64	35.48	42.8319	37.8034	14.085	20.05	0.702494	2.13626	1.88546	2.07681	2.95634	1	1	0	0	18.4333	18.4333
